# Supplementary figures and images for: Insm1 cooperates with Neurod1 and Foxa2 to maintain mature pancreatic β-cell function
Source: PubMed Central journal article supplement — EMBO J. 2015 Mar 31;34(10):1417–33. doi: 10.15252/embj.201490819 (PMC4492000; doi:10.15252/embj.201490819), 2015-03-31

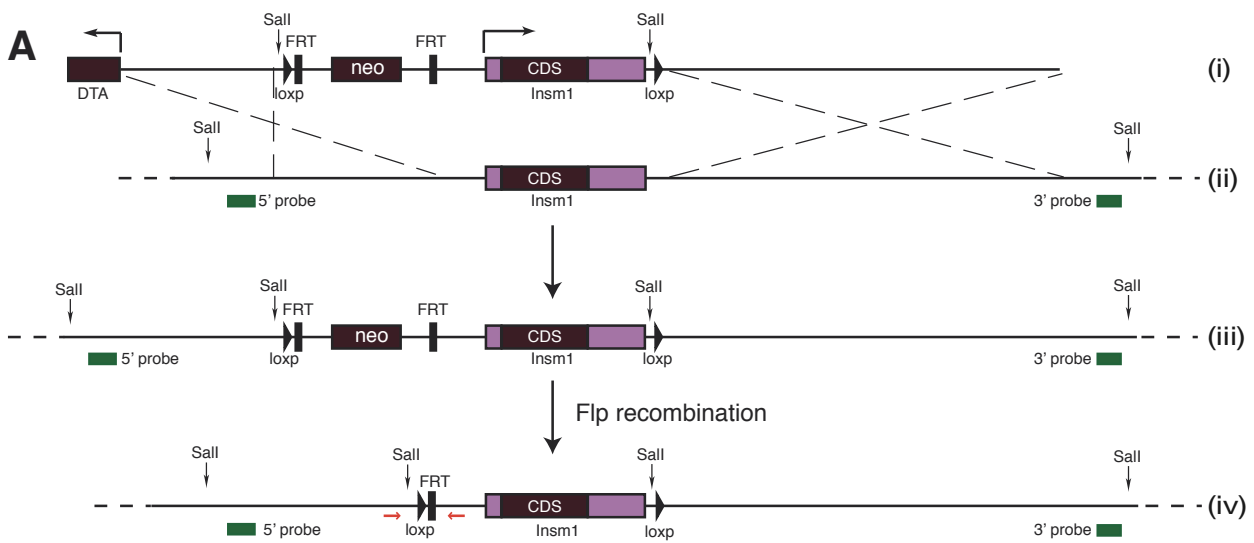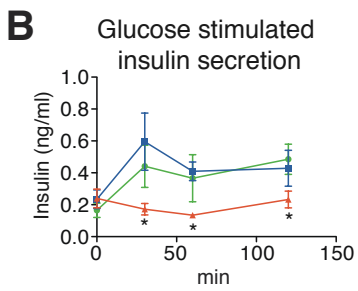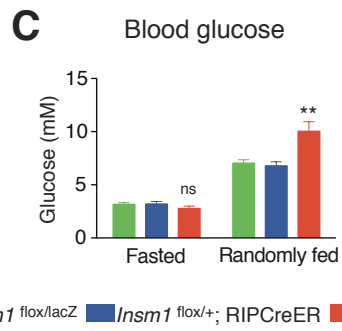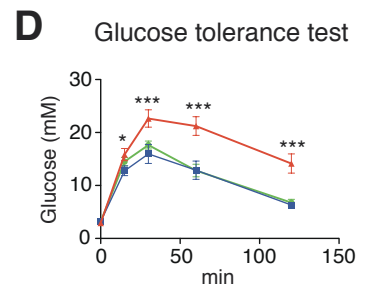

■ *Insm1*<sup>flox/lacZ</sup> ■ *Insm1*<sup>flox/+; RIPCreER</sup> ■ *Insm1*<sup>flox/lacZ; RIPCreER</sup>

Supplement: embj0034-1417-sd1.pdf [file embj0034-1417-sd1.pdf]

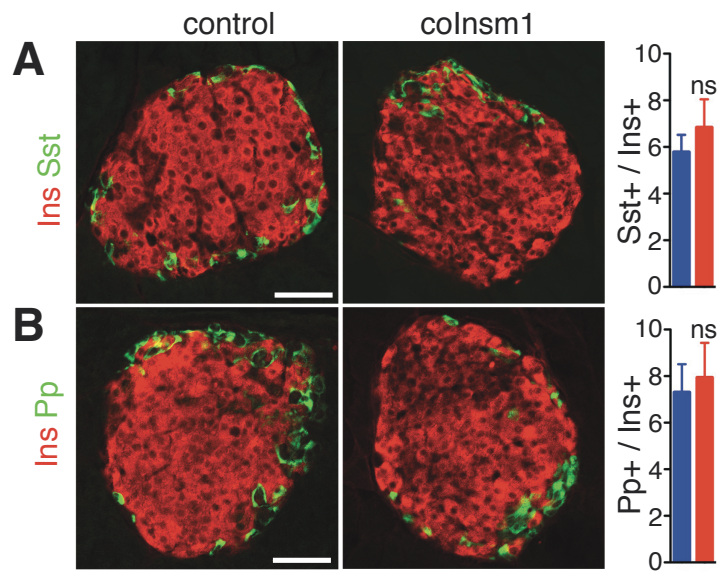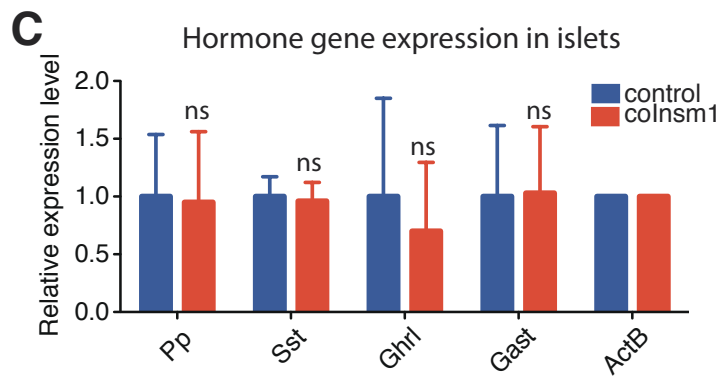

Supplement: embj0034-1417-sd2.pdf [file embj0034-1417-sd2.pdf]

Transcription factor expression in islets

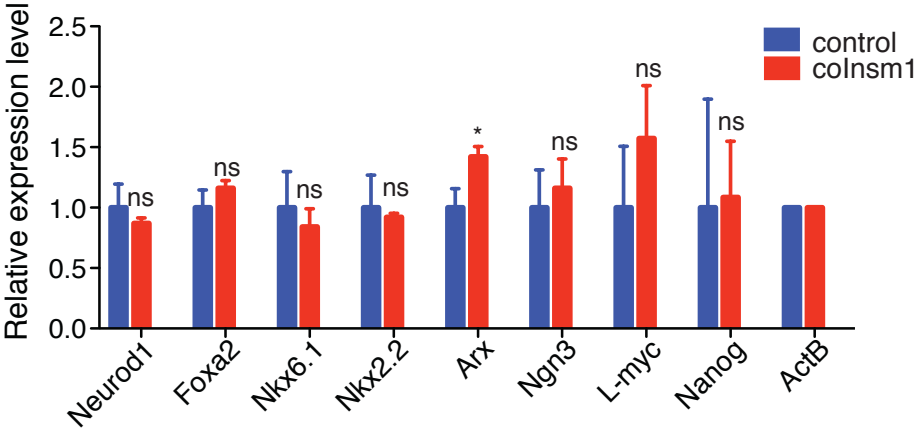

Supplement: embj0034-1417-sd3.pdf [file embj0034-1417-sd3.pdf]

**A** Insulin secretion, SJ beta cells

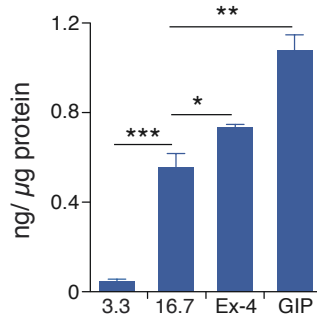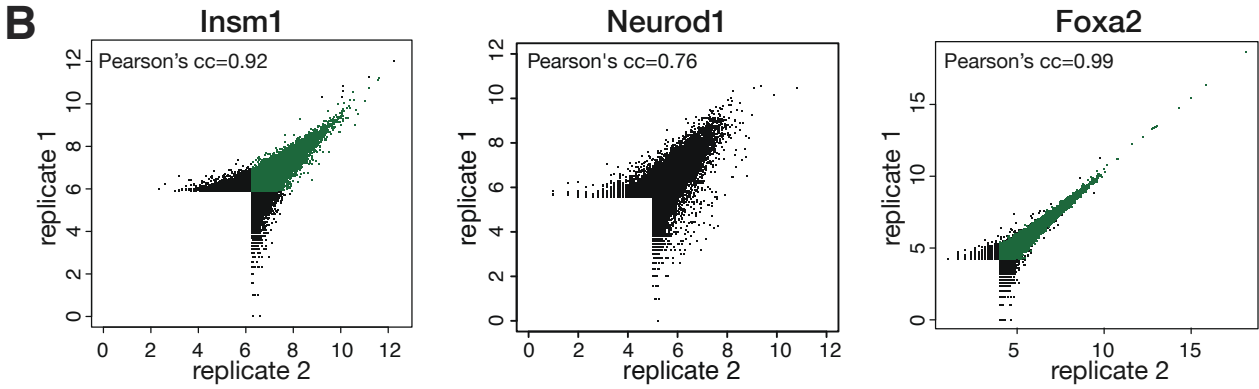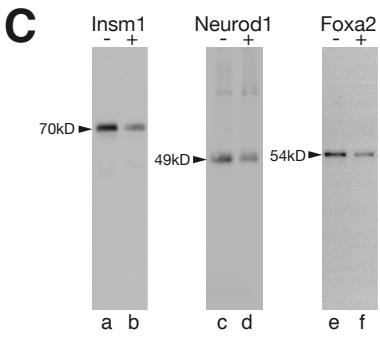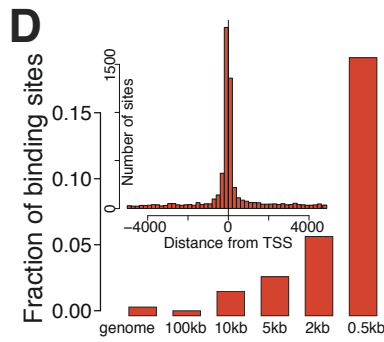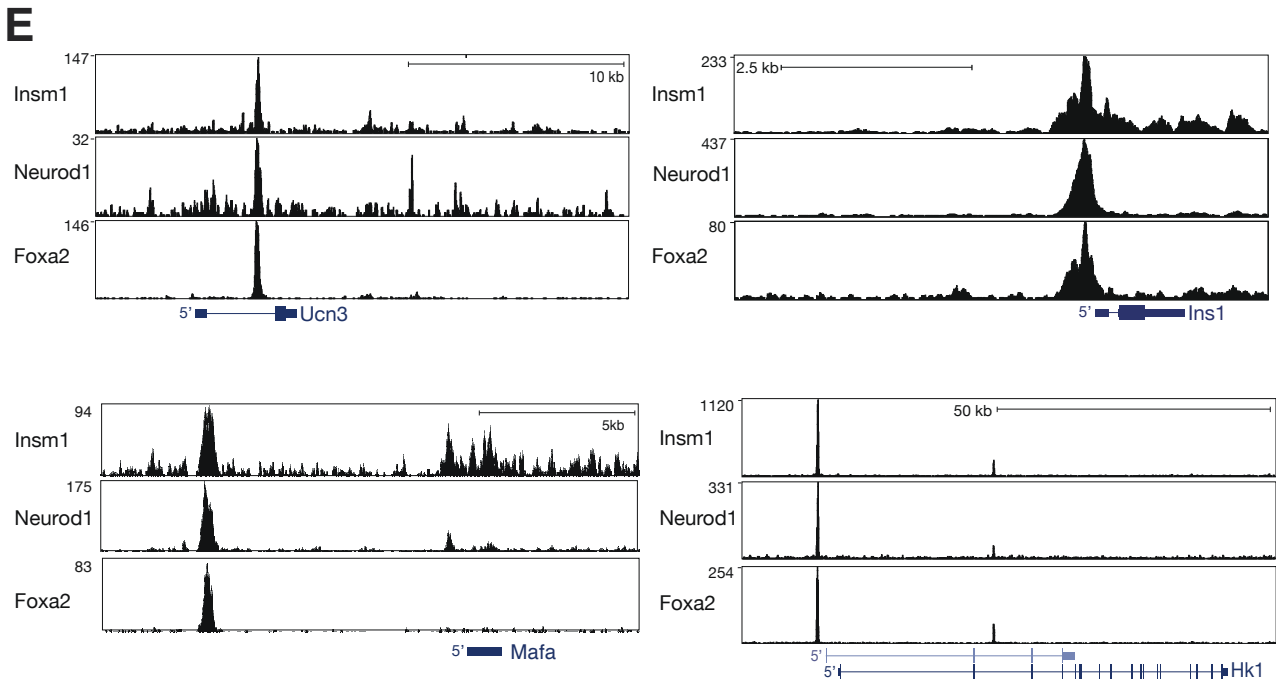

Supplement: embj0034-1417-sd4.pdf [file embj0034-1417-sd4.pdf]

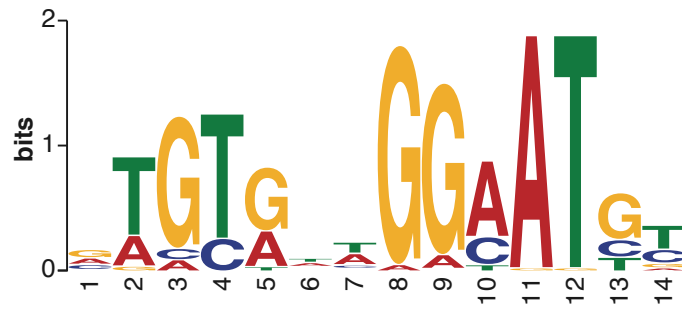

Supplement: embj0034-1417-sd5.pdf [file embj0034-1417-sd5.pdf]
